# Supplementary material
Source: PubMed Central journal article supplement (PMC6218836)
Supplement: CJN.13891217SupplementaryData.pdf [file CJN.13891217SupplementaryData.pdf]

*Supplemental material is neither peer-reviewed nor thoroughly edited by CJASN. The authors alone are responsible for the accuracy and presentation of the material.*

**Title: The Relationship between Intradialytic Hypotension and Hospitalized Mesenteric Ischemia: a Case-Control Study**

**Authors:**

**Eun Young Seong, MD<sup>1,2</sup>**

**Yuanchao Zheng, MS<sup>1</sup>**

**Wolfgang C. Winkelmayer, MD, MPH, ScD<sup>3</sup>**

**Maria E. Montez-Rath, PhD<sup>1</sup>**

**Tara I. Chang, MD, MS<sup>1</sup>**

*Supplemental material is neither peer-reviewed nor thoroughly edited by CJASN. The authors alone are responsible for the accuracy and presentation of the material.*

**Supplemental Table 1: ICD-9 codes used to identify comorbid conditions.**

**Supplemental Table 2: Association (odds ratio and 95% confidence intervals) of intradialytic hypotension (defined as Nadir90 and Nadir 100) with the all variables in the regression model.**

**Supplemental Table 3: Sensitivity analysis with patients restricted to having Medicare Part D in the 90 days prior to the index date. Characteristics of eligible patients with hospitalized mesenteric ischemia (cases) and without hospitalized mesenteric ischemia (controls).**

**Supplemental Figure 1: Schema for selection of cases and controls.**

**Supplemental Figure 2. Sensitivity analysis using cohort of patients with acute mesenteric ischemia. Odds of intradialytic hypotension (IDH) defined in six ways in the 30 days prior to an acute mesenteric ischemia event.**

**Supplemental Figure 3. Sensitivity analysis using uniform look back window of 180 days to ascertain comorbid conditions. Odds of intradialytic hypotension (IDH) defined in six ways in the 30 days prior to a hospitalized mesenteric ischemia event.**

**Supplemental Figure 4: Sensitivity analysis using cohort of patients with Medicare Part D and information on antihypertensive medication use. Odds of intradialytic hypotension (IDH) defined in six ways in the 30 days prior to a hospitalized mesenteric ischemia event.**

Supplemental material is neither peer-reviewed nor thoroughly edited by CJASN. The authors alone are responsible for the accuracy and presentation of the material.

**Supplemental Table 1. ICD-9 codes used to identify comorbid conditions.**

| <b>Comorbidity</b>               | <b>ICD-9 Codes</b>                                                                                                                                                                                                                                                                                                                                    |
|----------------------------------|-------------------------------------------------------------------------------------------------------------------------------------------------------------------------------------------------------------------------------------------------------------------------------------------------------------------------------------------------------|
| <b>Cardiovascular</b>            |                                                                                                                                                                                                                                                                                                                                                       |
| Coronary artery disease          | 36.1, 36.1x, 36.2, 414.0, 414.00, 414.01, 414.02, 414.03, 414.04, 414.05, 414.2, 414.3, 414.8, 414.9, v45.81, 00.66, 36.06, 36.07, 36.09, 36.0, 36.00, 36.01, 36.02, 36.05, v45.82                                                                                                                                                                    |
| Myocardial infarction            | 410.x, 412                                                                                                                                                                                                                                                                                                                                            |
| Angina                           | 411.x, 413.x                                                                                                                                                                                                                                                                                                                                          |
| Heart failure                    | 398.91, 402.01, 402.11, 402.91, 404.01, 404.03, 404.13, 404.91, 428.x                                                                                                                                                                                                                                                                                 |
| Hypertension                     | 401.0, 401.1, 401.9, 402.x, 403.x, 404.x, 405.x                                                                                                                                                                                                                                                                                                       |
| Atrial fibrillation              | 427.3x                                                                                                                                                                                                                                                                                                                                                |
| Arrhythmia                       | 426.x, 427.0, 427.20, 427.81, 427.9                                                                                                                                                                                                                                                                                                                   |
| Stroke/transient ischemic attack | 433.x, 434.x, 436.00, 435.x                                                                                                                                                                                                                                                                                                                           |
| Valvular disease                 | 394.x-397.1, 424.x, 746.3-746.6, v42.2, v43.3                                                                                                                                                                                                                                                                                                         |
| Cerebrovascular disease          | 433, 433.0, 433.00, 433.1, 433.10, 433.2, 433.20, 433.3, 433.30, 433.8, 433.80, 433.9, 433.90, 434, 434.0, 434.00, 434.1, 434.10, 434.9, 434.90, 437.x, 438.x, 438.10, 438.11, 438.12, 438.19, 438.20, 438.21, 438.22, 438.30, 438.31, 438.32, 438.40, 438.41, 438.42, 438.50, 438.51, 438.52, 438.53, 438.81, 438.82, 438.83, 438.84, 438.85, 438.89 |
| Peripheral arterial disease      | 38.08, 38.18, 38.38, 38.48, 39.25, 040.0, 250.7, 250.7x, 440.2, 440.2x, 440.4, 440.8, 440.9, 443.81, 443.9, 444.22, 444.81, 445.02, 707.1, 707.1x, 785.4                                                                                                                                                                                              |
| Lower limb amputation            | 84.1x                                                                                                                                                                                                                                                                                                                                                 |
| <b>Other Medical</b>             |                                                                                                                                                                                                                                                                                                                                                       |
| Diabetes mellitus                | 249.x, 250.x, 357.2, 362.0x                                                                                                                                                                                                                                                                                                                           |
| Hyperlipidemia                   | 272.x                                                                                                                                                                                                                                                                                                                                                 |
| Gastrointestinal bleeding        | 456.00, 456.0, 456.20, 530.21, 530.70, 530.82, 531.0x, 531.2x, 531.4x, 531.6x, 532.2x, 532.4x, 532.6x, 533.0x, 533.2x, 534.0x, 534.2x, 534.4x, 534.6x, 535.x1, 537.83, 537.84, 562.02, 562.03, 562.12, 562.13, 569.3, 569.85, 578.x                                                                                                                   |
| Peptic ulcer disease             | 531.7, 531.0, 531.71, 531.9, 531.90, 531.91, 532.7, 532.70, 532.71, 532.9x, 533.7x, 534.7x, 534.9x                                                                                                                                                                                                                                                    |
| Intracranial hemorrhage          | 430, 431.00, 432.x                                                                                                                                                                                                                                                                                                                                    |
| Liver disease                    | 070.x, 456.1, 456.21, 570-573.x, v42.7                                                                                                                                                                                                                                                                                                                |
| Chronic lung disease             | 490, 491.x-496, 500-505, 506.4, 516.x                                                                                                                                                                                                                                                                                                                 |
| Smoking history                  | 305.1x                                                                                                                                                                                                                                                                                                                                                |
| Alcohol abuse                    | 291.x, 303.x, 305.x                                                                                                                                                                                                                                                                                                                                   |
| Drug abuse                       | 292.x, 304.x, 305.x                                                                                                                                                                                                                                                                                                                                   |
| Dementia                         | 290.x, 294.1x, 331.x                                                                                                                                                                                                                                                                                                                                  |
| Depression                       | 296.2x, 296.3x, 296.5x, 296.82, 300.40, 301.12, 309.0, 309.10, 311                                                                                                                                                                                                                                                                                    |
| Cancer                           | 140.x-165.x, 170.x-172.x, 174.x, 175.x, 180.x-209.x, 238.6, 273.3                                                                                                                                                                                                                                                                                     |
| Hypothyroidism                   | 243, 244.0, 244.1, 244.2, 244.9, 244.9                                                                                                                                                                                                                                                                                                                |
| Obesity                          | 278.0x, 649.1x, v85.3x, v85.4                                                                                                                                                                                                                                                                                                                         |

Supplemental material is neither peer-reviewed nor thoroughly edited by CJASN. The authors alone are responsible for the accuracy and presentation of the material.

**Supplemental Table 2. Association (odds ratio and 95% confidence intervals) of intradialytic hypotension (defined as Nadir90 and Nadir 100) with the all variables in the regression model.**

| Variable                                 | Nadir90    |                         | Nadir100   |                         |
|------------------------------------------|------------|-------------------------|------------|-------------------------|
|                                          | Odds ratio | 95% confidence interval | Odds ratio | 95% confidence interval |
| Intradialytic hypotension                | 1.822      | 1.471 – 2.257           | 1.536      | 1.275 – 1.851           |
| <i>Cause of end stage kidney disease</i> |            |                         |            |                         |
| Diabetes                                 |            |                         | Ref.       |                         |
| Hypertension                             | 1.239      | 0.969 – 1.585           | 1.250      | 0.978 – 1.598           |
| Glomerulonephritis                       | 1.513      | 0.982 – 2.332           | 1.556      | 1.012 – 2.392           |
| Other                                    | 1.028      | 0.710 – 1.488           | 1.013      | 0.701 – 1.464           |
| Unknown                                  | 1.344      | 0.781 – 2.315           | 1.267      | 0.735 – 2.183           |
| <i>Health care use</i>                   |            |                         |            |                         |
| No. of non-nephrology outpatient visits  | 1.031      | 1.011 – 1.052           | 1.030      | 1.010 – 1.050           |
| Hospital days                            | 1.141      | 1.088 – 1.196           | 1.136      | 1.083 – 1.191           |
| Any nursing home stay                    | 1.048      | 0.785 – 1.400           | 1.055      | 0.791 – 1.407           |
| On kidney transplant waiting list        | 1.050      | 0.662 – 1.665           | 1.030      | 0.650 – 1.633           |
| <i>Comorbidities</i>                     |            |                         |            |                         |
| Myocardial infarction                    | 1.238      | 0.953 – 1.608           | 1.247      | 0.962 – 1.617           |
| Angina                                   | 1.102      | 0.862 – 1.409           | 1.119      | 0.876 – 1.428           |
| Heart failure                            | 0.871      | 0.689 – 1.101           | 0.857      | 0.678 – 1.084           |
| Hypertension                             | 0.976      | 0.543 – 1.755           | 0.984      | 0.546 – 1.772           |
| Atrial fibrillation                      | 1.319      | 1.063 – 1.637           | 1.348      | 1.088 – 1.670           |
| Other arrhythmia                         | 1.289      | 1.034 – 1.607           | 1.269      | 1.019 – 1.580           |
| Stroke/transient ischemic attack         | 0.921      | 0.713 – 1.191           | 0.910      | 0.705 – 1.175           |
| Valvular disease                         | 0.988      | 0.797 – 1.224           | 0.984      | 0.794 – 1.218           |
| Cerebrovascular disease                  | 1.208      | 0.945 – 1.544           | 1.218      | 0.953– 1.556            |
| Hyperlipidemia                           | 0.967      | 0.780 – 1.198           | 0.943      | 0.761 – 1.168           |
| Gastrointestinal bleeding                | 1.091      | 0.864 – 1.377           | 1.070      | 0.848 – 1.350           |
| Peptic ulcer disease                     | 1.683      | 1.112 – 2.549           | 1.686      | 1.114 – 2.552           |
| Intracranial hemorrhage                  | 1.227      | 0.629 – 2.391           | 1.256      | 0.644 – 2.450           |
| Liver disease                            | 1.184      | 0.856 – 1.638           | 1.209      | 0.874 – 1.671           |
| Chronic lung disease                     | 1.242      | 1.019 – 1.514           | 1.259      | 1.034 – 1.533           |
| Smoking history                          | 1.261      | 0.888 – 1.790           | 1.289      | 0.911 – 1.823           |

*Supplemental material is neither peer-reviewed nor thoroughly edited by CJASN. The authors alone are responsible for the accuracy and presentation of the material.*

| Variable                                 | Nadir90    |                         | Nadir100   |                         |
|------------------------------------------|------------|-------------------------|------------|-------------------------|
|                                          | Odds ratio | 95% confidence interval | Odds ratio | 95% confidence interval |
| Alcohol abuse                            | 1.243      | 0.576 – 2.684           | 1.314      | 0.613 – 2.819           |
| Drug abuse                               | 1.460      | 0.886 – 2.407           | 1.424      | 0.864 – 2.347           |
| Dementia                                 | 0.840      | 0.611 – 1.156           | 0.870      | 0.632 – 1.197           |
| Depression                               | 1.037      | 0.820 – 1.311           | 1.009      | 0.799 – 1.275           |
| Cancer                                   | 0.959      | 0.731 – 1.260           | 0.982      | 0.748 – 1.288           |
| Hypothyroidism                           | 1.122      | 0.897 – 1.403           | 1.132      | 0.906 – 1.415           |
| Obesity                                  | 1.019      | 0.770 – 1.349           | 1.066      | 0.808 – 1.407           |
| Mean ultrafiltration rate                | 1.001      | 0.974 – 1.029           | 1.000      | 0.973 – 1.028           |
| Any session with central venous catheter | 1.194      | 0.959 – 1.486           | 1.187      | 0.954 – 1.476           |

Supplemental material is neither peer-reviewed nor thoroughly edited by CJASN. The authors alone are responsible for the accuracy and presentation of the material.

**Supplemental Table 3. Sensitivity analysis with patients restricted to having Medicare Part D in the 90 days prior to the index date. Characteristics of eligible patients with hospitalized mesenteric ischemia (cases) and without hospitalized mesenteric ischemia (controls).**

|                                                        | CASES (n=427)<br>With Mesenteric<br>Ischemia | CONTROLS (n=1621)<br>Without Mesenteric<br>Ischemia |
|--------------------------------------------------------|----------------------------------------------|-----------------------------------------------------|
| <i>Demographics</i>                                    |                                              |                                                     |
| Age, years ( $\pm$ SD)                                 | 71 (10)                                      | 71 (10)                                             |
| Male                                                   | 169 (40%)                                    | 643 (40%)                                           |
| Race                                                   |                                              |                                                     |
| White                                                  | 302 (71%)                                    | 1169 (72%)                                          |
| Black                                                  | 101 (24%)                                    | 375 (23%)                                           |
| Asian                                                  | 14 (3%)                                      | 58 (4%)                                             |
| Native American                                        | 8 (2%)                                       | 18 (1%)                                             |
| Other/unknown                                          | 2 (0.5%)                                     | 1 (0.1%)                                            |
| Dialysis vintage, median (IQR), years                  | 1.6 (0.8, 2.7)                               | 1.6 (0.8, 2.7)                                      |
| <i>Year of dialysis initiation</i>                     |                                              |                                                     |
| 2006                                                   | 123 (29%)                                    | 463 (29%)                                           |
| 2007                                                   | 93 (22%)                                     | 355 (22%)                                           |
| 2008                                                   | 84 (20%)                                     | 320 (20%)                                           |
| 2009                                                   | 69 (16%)                                     | 269 (17%)                                           |
| 2010                                                   | 46 (11%)                                     | 175 (11%)                                           |
| 2011                                                   | 12 (3%)                                      | 39 (2%)                                             |
| <i>Cause of end stage kidney disease</i>               |                                              |                                                     |
| Diabetes                                               | 211 (49%)                                    | 913 (56%)                                           |
| Hypertension                                           | 143 (34%)                                    | 484 (30%)                                           |
| Glomerulonephritis                                     | 25 (6%)                                      | 55 (3%)                                             |
| Other                                                  | 36 (8%)                                      | 126 (8%)                                            |
| Unknown                                                | 12 (3%)                                      | 43 (3%)                                             |
| <i>Health care use in 30 days prior to Index Date</i>  |                                              |                                                     |
| Number of non-nephrology outpatient visits ( $\pm$ SD) | 5.4 (4.6)                                    | 4.9 (4.6)                                           |

Supplemental material is neither peer-reviewed nor thoroughly edited by CJASN. The authors alone are responsible for the accuracy and presentation of the material.

|                                                   | CASES (n=427)<br>With Mesenteric<br>Ischemia | CONTROLS (n=1621)<br>Without Mesenteric<br>Ischemia |
|---------------------------------------------------|----------------------------------------------|-----------------------------------------------------|
| Hospital days ( $\pm$ SD)                         | 1.0 (2.2)                                    | 0.5 (1.6)                                           |
| Any nursing home stay                             | 73 (17%)                                     | 222 (14%)                                           |
| On kidney transplant waiting list                 | 19 (4%)                                      | 91 (6%)                                             |
| <i>Cardiovascular comorbidities</i>               |                                              |                                                     |
| Coronary artery disease                           | 315 (74%)                                    | 1219 (75%)                                          |
| Myocardial infarction                             | 89 (21%)                                     | 285 (18%)                                           |
| Angina                                            | 118 (28%)                                    | 328 (20%)                                           |
| Heart failure                                     | 317 (74%)                                    | 1158 (71%)                                          |
| Hypertension                                      | 419 (98%)                                    | 1580 (98%)                                          |
| Atrial fibrillation                               | 170 (40%)                                    | 471 (29%)                                           |
| Other arrhythmia                                  | 140 (33%)                                    | 400 (25%)                                           |
| Stroke/transient ischemic attack                  | 115 (27%)                                    | 398 (25%)                                           |
| Valvular disease                                  | 152 (36%)                                    | 483 (30%)                                           |
| Cerebrovascular disease                           | 129 (30%)                                    | 423 (26%)                                           |
| Peripheral arterial disease/lower limb amputation | 248 (58%)                                    | 934 (58%)                                           |
| <i>Other medical comorbidities</i>                |                                              |                                                     |
| Diabetes mellitus                                 | 332 (78%)                                    | 1291 (80%)                                          |
| Hyperlipidemia                                    | 270 (63%)                                    | 1063 (66%)                                          |
| Gastrointestinal bleeding                         | 120 (28%)                                    | 370 (23%)                                           |
| Peptic ulcer disease                              | 37 (9%)                                      | 89 (6%)                                             |
| Intracranial hemorrhage                           | 13 (3%)                                      | 32 (2%)                                             |
| Liver disease                                     | 50 (12%)                                     | 158 (10%)                                           |
| Chronic lung disease                              | 228 (53%)                                    | 699 (43%)                                           |
| Smoking history                                   | 49 (12%)                                     | 126 (8%)                                            |
| Alcohol abuse                                     | 9 (2%)                                       | 32 (2%)                                             |
| Drug abuse                                        | 26 (6%)                                      | 50 (3%)                                             |

Supplemental material is neither peer-reviewed nor thoroughly edited by CJASN. The authors alone are responsible for the accuracy and presentation of the material.

|                                                                  | CASES (n=427)<br>With Mesenteric<br>Ischemia | CONTROLS (n=1621)<br>Without Mesenteric<br>Ischemia |
|------------------------------------------------------------------|----------------------------------------------|-----------------------------------------------------|
| Dementia                                                         | 55 (13%)                                     | 204 (13%)                                           |
| Depression                                                       | 118 (28%)                                    | 361 (22%)                                           |
| Cancer                                                           | 59 (14%)                                     | 204 (13%)                                           |
| Hypothyroidism                                                   | 102 (24%)                                    | 343 (21%)                                           |
| Obesity                                                          | 76 (18%)                                     | 240 (15%)                                           |
| <i>Dialysis information from the 30 days prior to index date</i> |                                              |                                                     |
| Total number of dialysis sessions                                | 12.3 (1.1)                                   | 12.7 (1.1)                                          |
| Treatment time (minutes)                                         | 210 (27)                                     | 208 (25)                                            |
| Ultrafiltration volume (L)                                       | -2.4 (1.3)                                   | -2.4 (1.2)                                          |
| Ultrafiltration rate (mL/hr/kg)                                  | 8.7 (3.7)                                    | 8.8 (3.3)                                           |
| Systolic blood pressure                                          |                                              |                                                     |
| Pre-dialysis SBP (mmHg)                                          | 142 (22)                                     | 147 (20)                                            |
| Post-dialysis SBP (mmHg)                                         | 135 (20)                                     | 139 (19)                                            |
| Nadir SBP (mmHg)                                                 | 106 (18)                                     | 111 (17)                                            |
| Change in SBP (pre-dialysis–nadir SBP, mmHg)                     | 36 (16)                                      | 36 (16)                                             |
| Diastolic blood pressure                                         |                                              |                                                     |
| Pre-dialysis DBP (mmHg)                                          | 69 (11)                                      | 72 (11)                                             |
| Post-dialysis DBP (mmHg)                                         | 66 (10)                                      | 68 (10)                                             |
| Nadir DBP (mmHg)                                                 | 56 (10)                                      | 59 (10)                                             |
| Change in DBP (pre-dialysis–nadir DBP, mmHg)                     | 13 (8)                                       | 12 (8)                                              |
| Any session with CVC                                             | 140 (33%)                                    | 467 (29%)                                           |
| <i>Antihypertensive use in 90 days prior to index date</i>       |                                              |                                                     |
| Number of antihypertensive classes                               |                                              |                                                     |
| 0                                                                | 77 (18%)                                     | 256 (16%)                                           |
| 1 to 3                                                           | 190 (45%)                                    | 746 (46%)                                           |
| 4+                                                               | 160 (38%)                                    | 619 (38%)                                           |



*Supplemental material is neither peer-reviewed nor thoroughly edited by CJASN. The authors alone are responsible for the accuracy and presentation of the material.*

|                         | CASES (n=427)<br>With Mesenteric<br>Ischemia | CONTROLS (n=1621)<br>Without Mesenteric<br>Ischemia |
|-------------------------|----------------------------------------------|-----------------------------------------------------|
| Medication              |                                              |                                                     |
| ACEI/ARB                | 178 (42%)                                    | 679 (42%)                                           |
| Calcium channel blocker | 169 (40%)                                    | 722 (45%)                                           |
| Beta blocker            | 241 (56%)                                    | 949 (59%)                                           |
| Diuretic                | 101 (24%)                                    | 395 (24%)                                           |
| Alpha blocker           | 31 (7%)                                      | 123 (8%)                                            |
| Central alpha agonist   | 65 (15%)                                     | 229 (14%)                                           |
| Nitrate                 | 65 (15%)                                     | 258 (16%)                                           |
| Vasodilator             | 101 (24%)                                    | 300 (19%)                                           |

SBP, systolic blood pressure, DBP, diastolic blood pressure, CVC, central venous catheter, ACEI, angiotensin converting enzyme inhibitor, ARB, angiotensin receptor blocker

Values are presented as mean ( $\pm$ SD), n (%) or median (interquartile range), unless otherwise indicated.

Supplemental material is neither peer-reviewed nor thoroughly edited by CJASN. The authors alone are responsible for the accuracy and presentation of the material.

**Supplemental Figure 1. Schema for selection of cases and controls.**

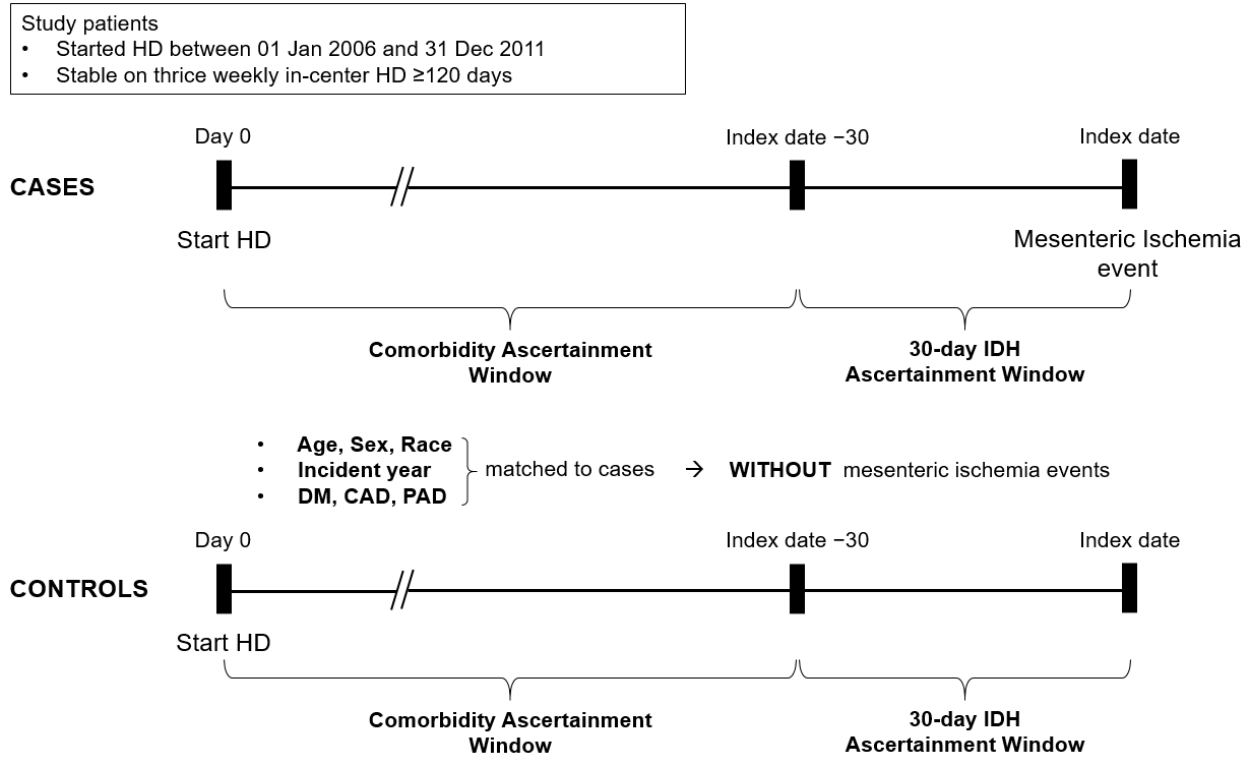

Abbreviations: HD, hemodialysis, IDH, intradialytic hypotension, DM, diabetes mellitus, CAD, coronary artery disease, PAD, peripheral artery disease

Supplemental material is neither peer-reviewed nor thoroughly edited by CJASN. The authors alone are responsible for the accuracy and presentation of the material.

**Supplemental Figure 2. Sensitivity analysis using cohort of patients with acute mesenteric ischemia. Odds of intradialytic hypotension (IDH) defined in six ways in the 30 days prior to an acute mesenteric ischemia event.**

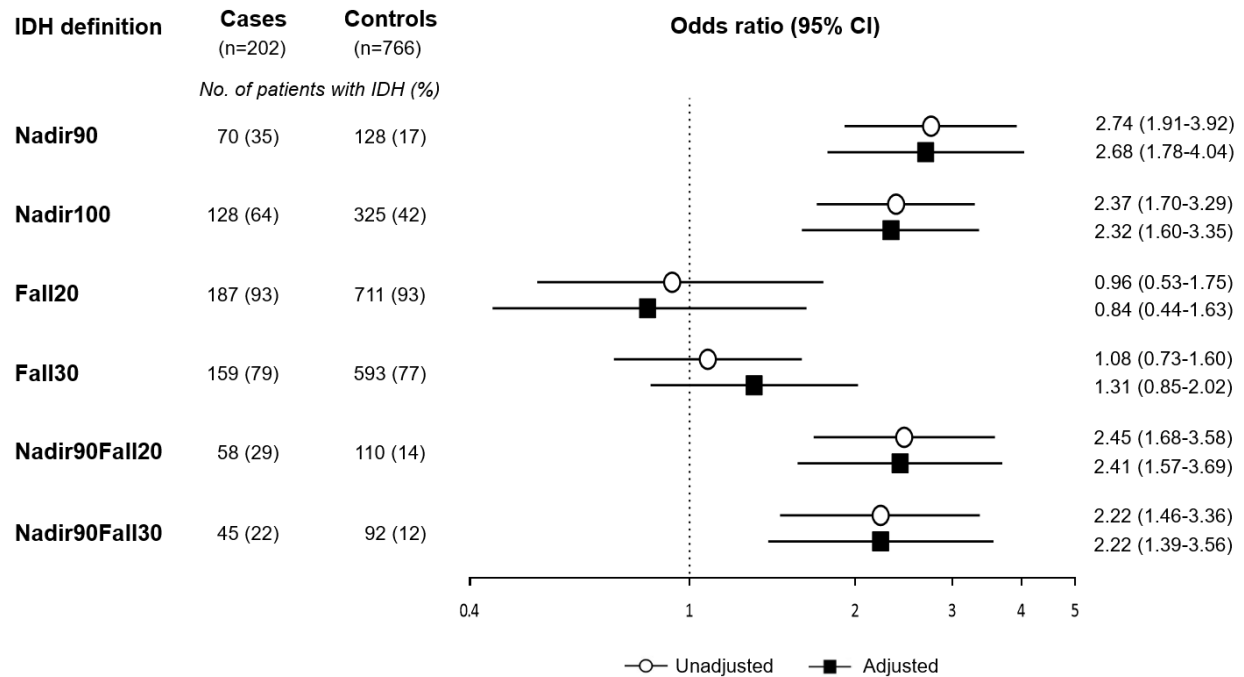

Adjusted: adjusted for cause of end stage kidney disease, number of non-nephrology outpatient visits, hospital days, any nursing home stay, on kidney transplant waiting list, all comorbidities, mean ultrafiltration rate and central venous catheter use.

Abbreviations: Nadir90, nadir intradialytic systolic blood pressure (SBP) <90 mmHg; Nadir100, nadir intradialytic SBP <100 mmHg; Fall20, (pre-dialysis SBP – nadir intradialytic SBP) ≥20 mmHg; Fall30, (pre-dialysis SBP – nadir intradialytic SBP) ≥30 mmHg; Nadir90Fall20, nadir intradialytic SBP <90 mmHg and (pre-dialysis SBP – nadir intradialytic SBP) ≥20 mmHg; Nadir90Fall30, nadir intradialytic SBP <90 mmHg and (pre-dialysis SBP – nadir intradialytic SBP) ≥30 mmHg

Supplemental material is neither peer-reviewed nor thoroughly edited by CJASN. The authors alone are responsible for the accuracy and presentation of the material.

**Supplemental Figure 3. Sensitivity analysis using uniform look back window of 180 days to ascertain comorbid conditions. Odds of intradialytic hypotension (IDH) defined in six ways in the 30 days prior to a hospitalized mesenteric ischemia event.**

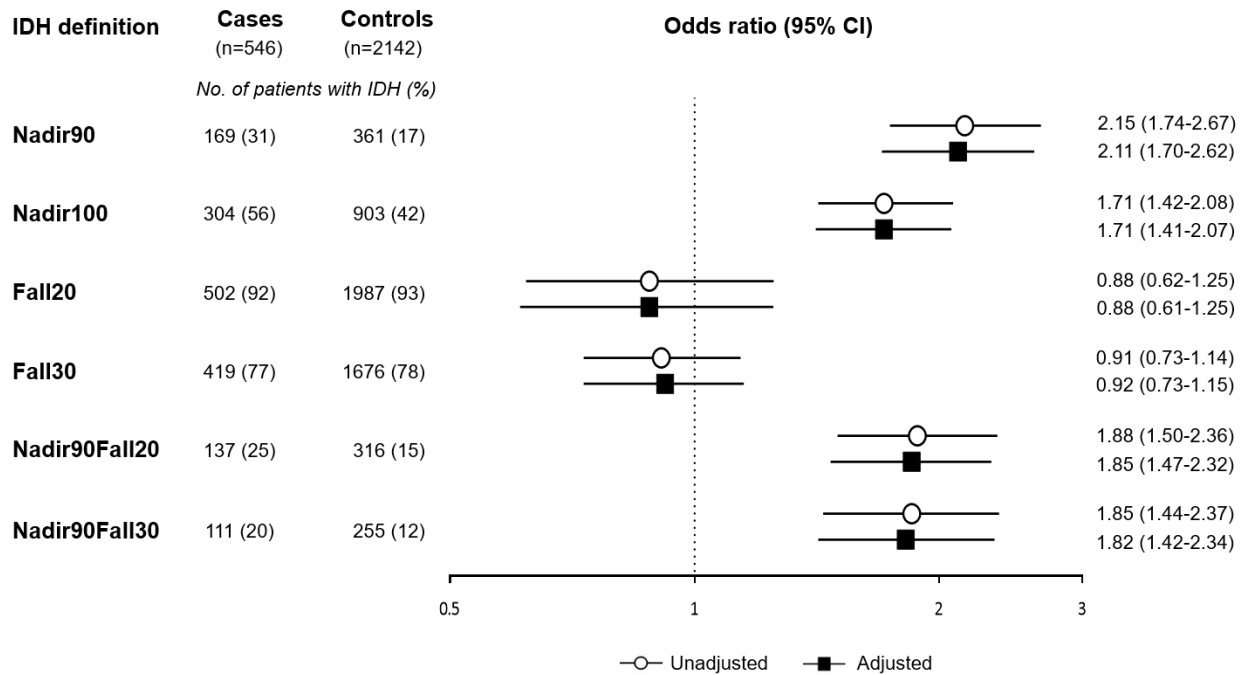

Adjusted: adjusted for cause of end stage kidney disease, number of non-nephrology outpatient visits, hospital days, any nursing home stay, on kidney transplant waiting list, all comorbidities, mean ultrafiltration rate and central venous catheter use.

Abbreviations: Nadir90, nadir intradialytic systolic blood pressure (SBP) <90 mmHg; Nadir100, nadir intradialytic SBP <100 mmHg; Fall20, (pre-dialysis SBP – nadir intradialytic SBP) ≥20 mmHg; Fall30, (pre-dialysis SBP – nadir intradialytic SBP) ≥30 mmHg; Nadir90Fall20, nadir intradialytic SBP <90 mmHg and (pre-dialysis SBP – nadir intradialytic SBP) ≥20 mmHg; Nadir90Fall30, nadir intradialytic SBP <90 mmHg and (pre-dialysis SBP – nadir intradialytic SBP) ≥30 mmHg

Supplemental material is neither peer-reviewed nor thoroughly edited by CJASN. The authors alone are responsible for the accuracy and presentation of the material.

**Supplemental Figure 4. Sensitivity analysis using cohort of patients with Medicare Part D and information on antihypertensive medication use. Odds of intradialytic hypotension (IDH) defined in six ways in the 30 days prior to a hospitalized mesenteric ischemia event.**

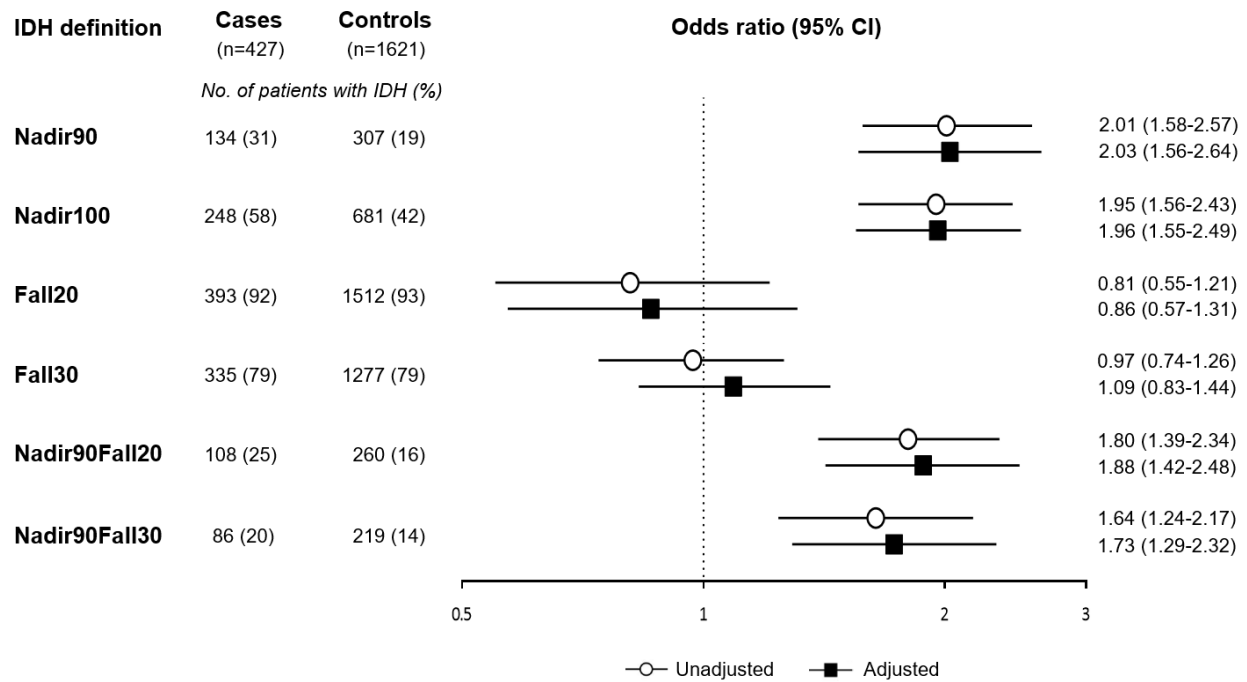

Adjusted: adjusted for cause of end stage kidney disease, number of non-nephrology outpatient visits, hospital days, any nursing home stay, on kidney transplant waiting list, all comorbidities, mean ultrafiltration rate and central venous catheter use.

Abbreviations: Nadir90, nadir intradialytic systolic blood pressure (SBP) <90 mmHg; Nadir100, nadir intradialytic SBP <100 mmHg; Fall20, (pre-dialysis SBP – nadir intradialytic SBP) ≥20 mmHg; Fall30, (pre-dialysis SBP – nadir intradialytic SBP) ≥30 mmHg; Nadir90Fall20, nadir intradialytic SBP <90 mmHg and (pre-dialysis SBP – nadir intradialytic SBP) ≥20 mmHg; Nadir90Fall30, nadir intradialytic SBP <90 mmHg and (pre-dialysis SBP – nadir intradialytic SBP) ≥30 mmHg
